# Supplementary material
Source: Elsevier journal article supplement (https://www.sciencedirect.com/science/article/pii/S0300893222001166)
Supplement: mmc1 [file S0300893222001166:mmc1.pdf]

## SUPPLEMENTARY DATA

**Table 1 of the supplementary data.** Relationship between past and current physical activity (total and by intensity), and HDL antioxidant capacity adjusted for confounding variables defined as model 1 and model 2 –

|                                                 | Model 1                     |                  |        | Model 2                     |                  |        |
|-------------------------------------------------|-----------------------------|------------------|--------|-----------------------------|------------------|--------|
|                                                 | $\beta$                     | 95%CI            | P      | $\beta$                     | 95% CI           | P      |
| <b>Total physical activity</b>                  |                             |                  |        |                             |                  |        |
| Past total LTPA (100 METs x min/d)              | –0.001                      | –0.004, 0.003    | .691   | 0.000                       | –0.004, 0.003    | .928   |
| Current total LTPA (100 METs x min/d)           | Nonlinear $P < .001$        |                  |        | Nonlinear $P < .001$        |                  |        |
| < 400 METs x min/d current total LTPA           | –0.022                      | –0.030, –0.013   | < .001 | –0.021                      | –0.030, –0.012   | < .001 |
| $\geq 400$ METs x min/d current total LTPA      | 0.002                       | –0.005, 0.008    | .632   | 0.002                       | –0.005, 0.008    | .554   |
| <b>Physical activity according to intensity</b> |                             |                  |        |                             |                  |        |
| Past physical activity practice                 |                             |                  |        |                             |                  |        |
| Past light LTPA (100 METs-min/d)                | –0.008                      | (–0.016, 0.000)  | .039   | –0.007                      | (–0.016, 0.000)  | .058   |
| Past moderate LTPA (100 METs x min/d)           | 0.001                       | (–0.005, 0.007)  | .677   | 0.002                       | (–0.005, 0.007)  | .587   |
| Past vigorous LTPA (100 METs x min/d)           | 0.001                       | (–0.004, 0.007)  | .638   | 0.002                       | (–0.004, 0.007)  | .515   |
| Current physical activity practice              |                             |                  |        |                             |                  |        |
| Current light LTPA (100 METs x min/d)           | –0.011                      | (–0.019, –0.003) | .010   | –0.010                      | (–0.019, –0.003) | .013   |
| Current moderate LTPA (100 METs x min/d)        | Nonlinear $P$ value = 0.042 |                  |        | Nonlinear $P$ value < 0.046 |                  |        |
| < 200 METs x min/d current moderate LTPA        | –0.028                      | (–0.049, –0.007) | .010   | –0.028                      | (–0.049, –0.007) | .011   |
| $\geq 200$ METs x min/d current moderate LTPA   | 0.007                       | (–0.005, 0.019)  | .265   | 0.007                       | (–0.005, 0.019)  | .276   |
| Current vigorous LTPA (100 METs x min/d)        | Nonlinear $P = .076$        |                  |        | Nonlinear $P = .083$        |                  |        |
| < 200 METs x min/d current vigorous LTPA        | –0.025                      | (–0.043, –0.007) | .007   | –0.024                      | (–0.043, –0.007) | .010   |
| $\geq 200$ METs x min/d current vigorous LTPA   | –0.004                      | (–0.012, 0.005)  | .363   | –0.003                      | (–0.012, 0.005)  | .495   |

Model 1, adjusted for age, sex, smoking status, diabetes, high-density lipoprotein cholesterol and low-density lipoprotein cholesterol. Model 2, further adjusted for body mass index. LTPA, leisure time physical activity;  $\beta$ , linear regression coefficient; CI, confidence interval.

**Figure 1 of the supplementary data.**

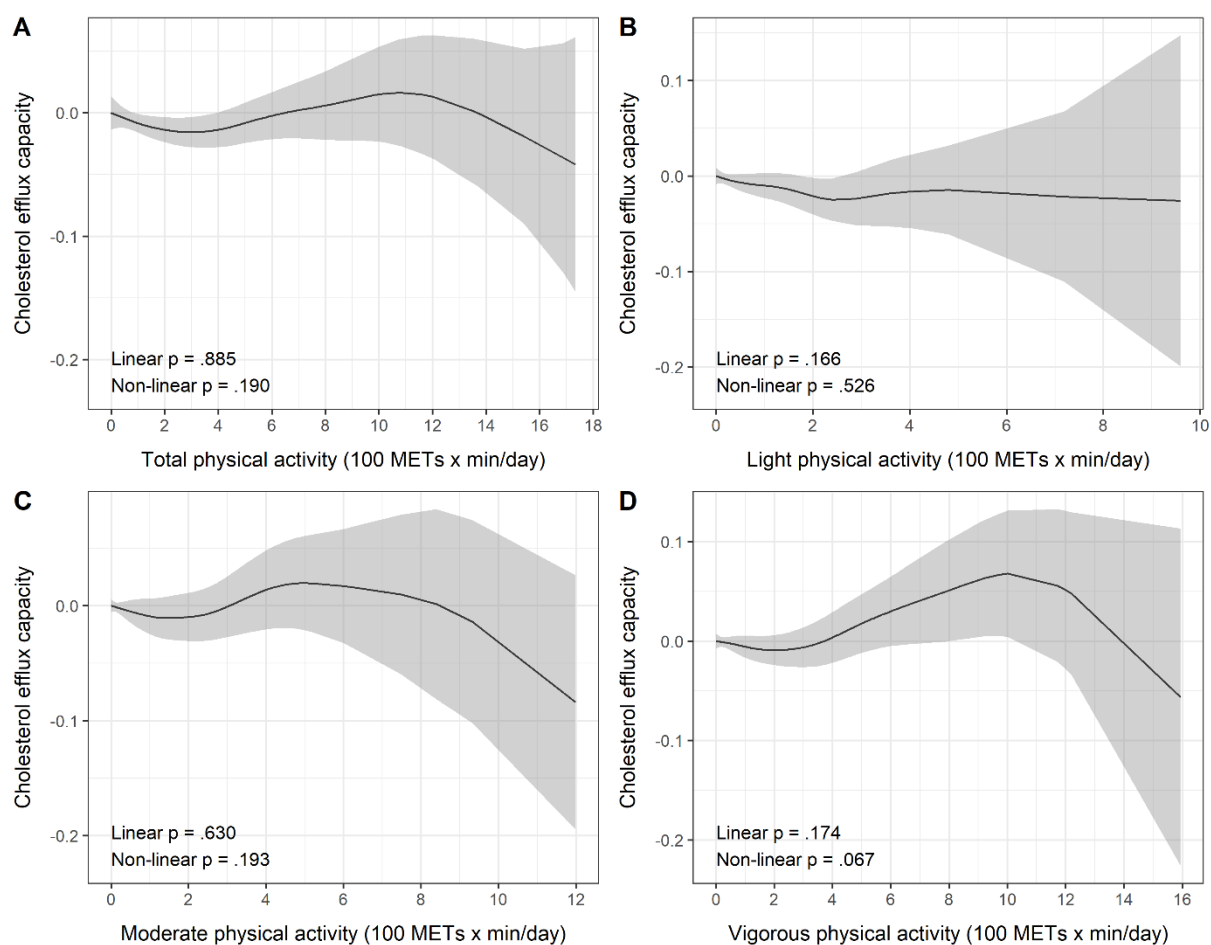

Dose-response association of different intensities of current leisure time physical activity (total, and light-, moderate- and vigorous-intensity [100 METs x min/d]) and cholesterol efflux capacity, assessed by restricted cubic splines. The black line represents the estimated effect size of the association and the grey area the 95% confidence interval.
